# Supplementary material
Source: PubMed Central journal article supplement (PMC2519560)
Supplement: supp_82_16_8085__1.pdf [file supp_82_16_8085__1.pdf]

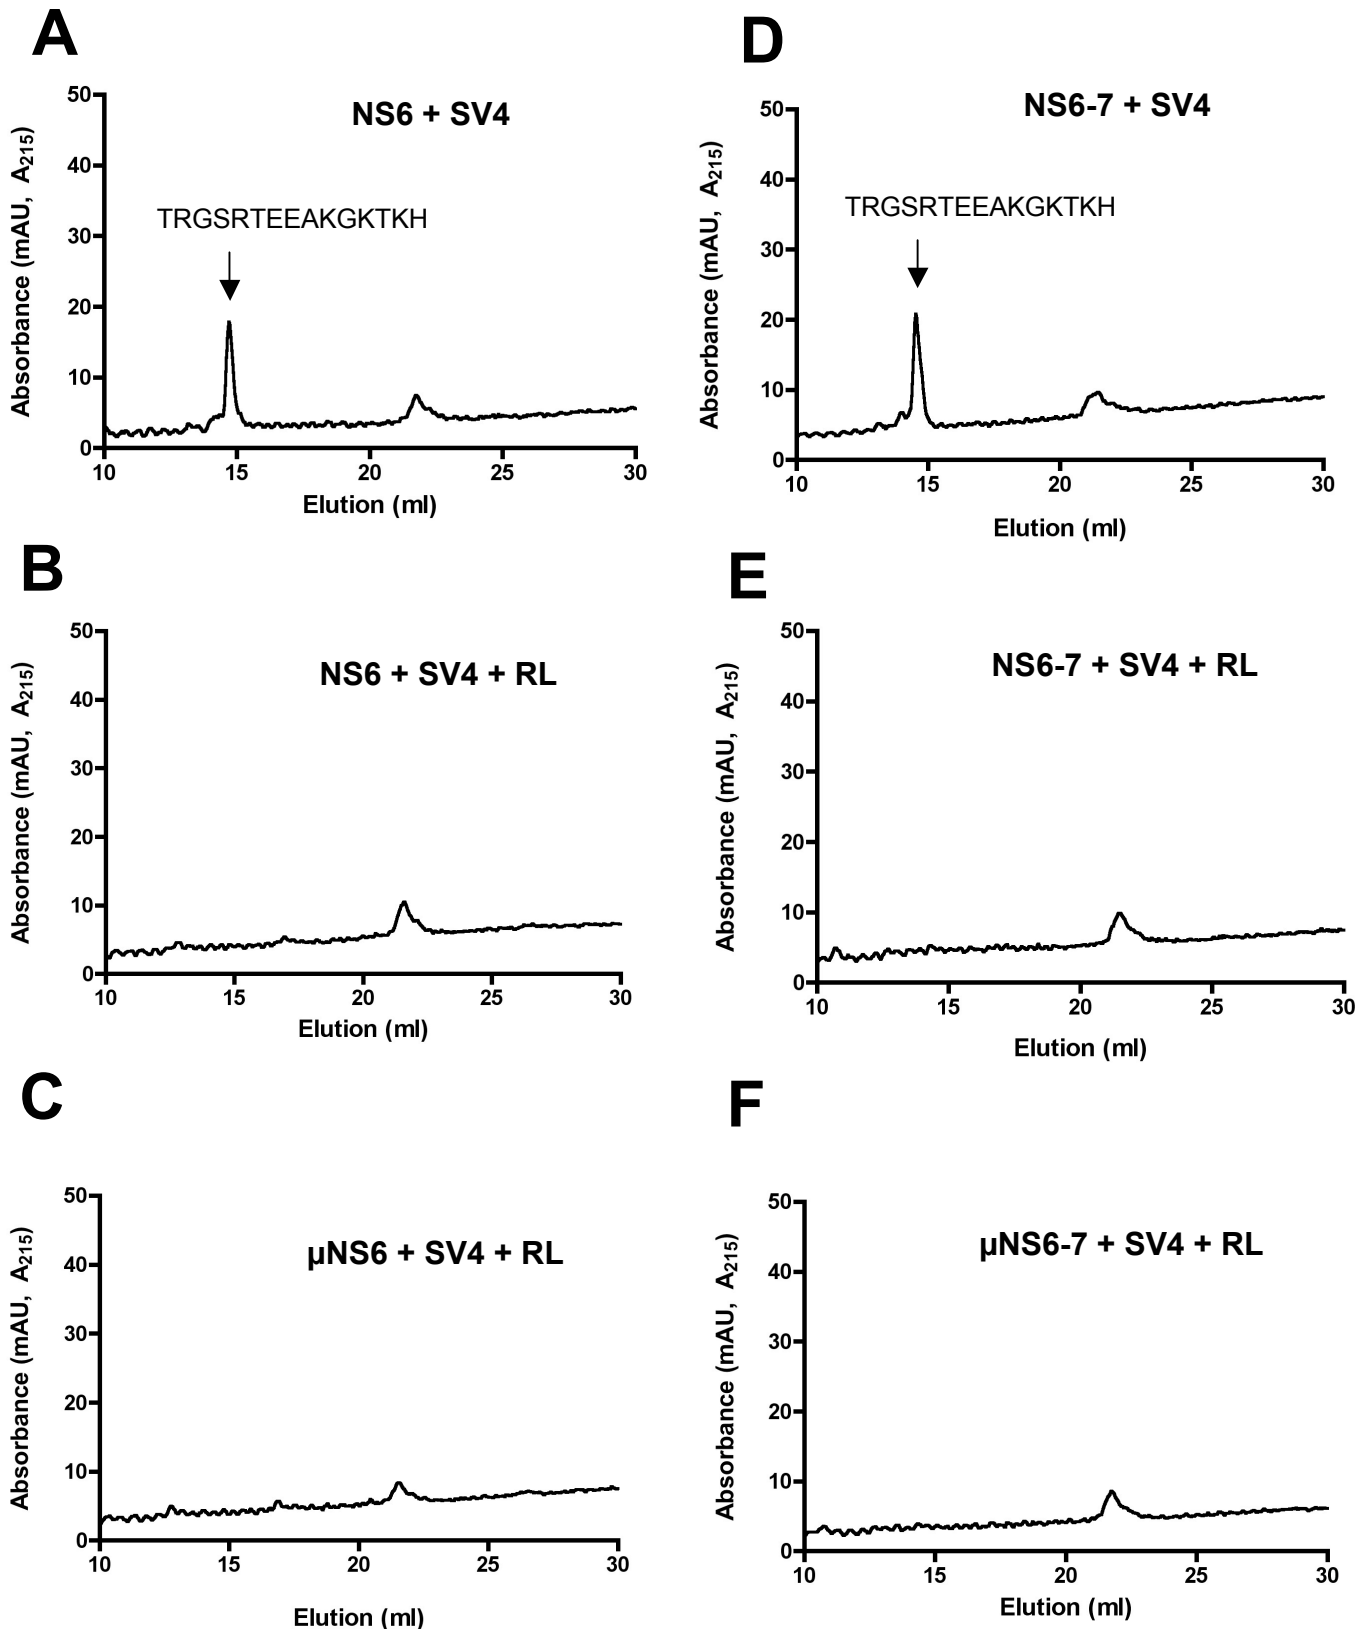

**Supplementary data. Non-specific *trans* cleavage of the SV4 (NS4-NS5) peptide in the presence of the reticulocyte lysates.** The peptide SV4 (NH<sub>2</sub>-TRGSRTEEAKGKTKH-COOH, 30  $\mu$ M) was incubated with purified NS6 or NS6-7 or their respective active site mutants  $\mu$ NS6 and  $\mu$ NS6-7 at 30 °C for 17 h in the presence or absence of reticulocyte lysates, as indicated. Cleavage products are monitored by reversed-phase HPLC as described in Materials and Methods. **A**, **B** and **C**, incubation of peptide SV4 with NS6, NS6 in the presence of reticulocyte lysates, and  $\mu$ NS6 in the presence of reticulocyte lysates, respectively. The peptide is completely cleaved in the presence of reticulocyte lysates independently of the presence of the active protease NS6 or its active site mutant  $\mu$ NS6. **D**, **E** and **F**, incubation of peptide SV4 with NS6-7, NS6-7 in the presence of reticulocyte lysates, and  $\mu$ NS6-7 in the presence of reticulocyte lysates, respectively. The peptide is completely cleaved in the presence of reticulocyte lysates independently of the presence of the active protease NS6-7 or its active site mutant  $\mu$ NS6-7. RL, reticulocyte lysates.
